# Supplementary material for: Oxidation of Monolignols by Members of the Berberine Bridge Enzyme Family Suggests a Role in Plant Cell Wall Metabolism
Source: PubMed Central journal article supplement (PMC4513132; doi:10.1074/jbc.m115.659631), 2015-06-02
Supplement: supp_M115.659631_jbc.M115.659631-1.pdf [file supp_M115.659631_jbc.M115.659631-1.pdf]

***Oxidation of Monolignols by Members of the Berberine Bridge Enzyme Family Suggests a Role in  
Plant Cell Wall Metabolism***

***Supplementary Information***

**Bastian Daniel,<sup>1</sup> Tea Pavkov-Keller<sup>2,3</sup>, Barbara Steiner,<sup>1</sup> Anđela Dordić<sup>2,3</sup>, Alexander Gutmann,<sup>4</sup>  
Bernd Nidetzky,<sup>4</sup> Christoph W. Sensen,<sup>5</sup> Eric van der Graaff,<sup>6</sup> Silvia Wallner,<sup>1</sup> Karl Gruber<sup>2</sup>  
and Peter Macheroux<sup>1\*†</sup>**

<sup>1</sup>Graz University of Technology, Institute of Biochemistry, Graz, Austria

<sup>2</sup>University of Graz, Institute of Molecular Biosciences, Graz, Austria

<sup>3</sup>Austrian Centre of Industrial Biotechnology, Graz, Austria

<sup>4</sup>Graz University of Technology, Institute of Biotechnology and Biochemical Engineering, Graz,  
Austria

<sup>5</sup>Graz University of Technology, Institute of Molecular Biotechnology, Graz, Austria

<sup>6</sup>Copenhagen University, Copenhagen, Denmark

Table S1: Thermofluor measurements with selected compounds

| Substance                                      | CAS-number | T <sub>m</sub> [°C] | ΔT <sub>m</sub> [°C] |
|------------------------------------------------|------------|---------------------|----------------------|
| 2-Deoxyglucose                                 | 154-17-6   | 78                  | 17                   |
| D,L-Proline                                    | 609-36-9   | 77.5                | 16.5                 |
| trans-Cinnamyl alcohol                         | 104-54-1   | 76.5                | 15.5                 |
| D-Glucose                                      | 492-62-6   | 76                  | 15                   |
| 3-Aminobenzyl alcohol                          | 1877-77-6  | 75                  | 14                   |
| 3,4-Dimethoxybenzyl alcohol                    | 93-03-8    | 75                  | 14                   |
| 4-Isopropylbenzyl alcohol                      | 536-60-7   | 74.5                | 13.5                 |
| (S)-(-)-Limonen                                | 5989-54-8  | 74                  | 13                   |
| Benzylalcohol                                  | 100-51-6   | 73                  | 12                   |
| Geraniol                                       | 106-24-1   | 73                  | 12                   |
| Lactose monohydrate                            | 64044-51-5 | 72                  | 11                   |
| D-Maltose                                      |            | 72                  | 11                   |
| Anthranilic acid                               | 118-92-3   | 71                  | 10                   |
| Cellobiose                                     | 528-50-7   | 71                  | 10                   |
| 4-Chlorobenzyl alcohol                         | 873-76-7   | 71                  | 10                   |
| D-Galactose                                    | 59-23-4    | 71                  | 10                   |
| D-Sorbitol                                     | 50-70-4    | 71                  | 10                   |
| Furfuryl alcohol                               | 98-00-0    | 70.5                | 9.5                  |
| 2-Indanol                                      | 4254-29-9  | 70.5                | 9.5                  |
| Polygalacturonic acid                          | 25990-10-7 | 70                  | 9                    |
| (+)-Pulegone                                   | 89-82-7    | 70                  | 9                    |
| Eugenol                                        | 97-53-0    | 65.5                | 4.5                  |
| Xylose                                         | 58-86-6    | 66.5                | 5.5                  |
| 3-Methoxyphenol                                | 150-19-6   | 64.5                | 3.5                  |
| D-Lyxose                                       | 1114-34-7  | 64                  | 3                    |
| Acetylacetone                                  | 123-54-6   | 63.5                | 2.5                  |
| 3-(3,4-Dihydroxyphenyl)-DL-alanine<br>(L-DOPA) | 63-84-3    | 63.5                | 2.5                  |
| 3-Aminosalicylic acid                          | 570-23-0   | 63                  | 2                    |
| 2-Aminothiophenol                              | 137-07-5   | 63                  | 2                    |
| p-Anisidine                                    | 104-94-9   | 63                  | 2                    |
| (S)-(-)-β-Citronellol                          | 7540-51-4  | 63                  | 2                    |
| 3,4-Dimethoxybenzotrile                        | 2024-82-1  | 63                  | 2                    |
| Flavone                                        | 525-82-6   | 63                  | 2                    |
| Isopropyl salicylate                           | 607-85-2   | 63                  | 2                    |
| Vanillin                                       | 121-33-5   | 63                  | 2                    |
| meso-Erythritol                                | 149-32-6   | 62.5                | 1.5                  |
| 2-Acetyl-5-bromothiophene                      | 5370-25-2  | 62                  | 1                    |
| 1,1'-Bi-2-naphthol                             | 602-09-5   | 62                  | 1                    |
| 3-Chlorocoumarin                               | 92-45-5    | 62                  | 1                    |
| Dihydrocarveol                                 | 619-01-2   | 62                  | 1                    |
| 3-Aminophenol                                  | 591-27-5   | 61.5                | 0.5                  |
| Coumarin                                       | 91-64-5    | 61.5                | 0.5                  |
| Diacetyldioxim                                 | 95-45-4    | 61.5                | 0.5                  |
| 2,6-Lutidin                                    | 108-48-5   | 61.5                | 0.5                  |

|                                        |            |      |      |
|----------------------------------------|------------|------|------|
| (+/-)-Mandelic acid                    | 611-72-3   | 61.5 | 0.5  |
| Acetone cyanohydrin                    | 75-86-5    | 61   | 0    |
| Acetylacetone                          | 110-13-4   | 61   | 0    |
| Benzamide                              | 55-21-0    | 61   | 0    |
| (R)-(-)-3-Chloromandelic acid          | 61008-98-8 | 61   | 0    |
| trans-Cinnamitrile                     | 1885-38-7  | 61   | 0    |
| o-Cresol                               | 95-48-7    | 61   | 0    |
| 1,2-Dihydronaphtalen                   | 446-53-0   | 61   | 0    |
| 4,4'-Dimethoxybenzoin                  | 119-25-8   | 61   | 0    |
| 2,6-Dimethoxyphenol                    | 91-10-1    | 61   | 0    |
| 2,6-Dimethylaniline                    | 87-62-7    | 61   | 0    |
| 2,6-Dimethylanisol                     | 1004-66-6  | 61   | 0    |
| 8-Hydroxyquinoline                     | 148-24-3   | 61   | 0    |
| Maltose                                | 69-79-4    | 61   | 0    |
| Mandelonitrile                         | 532-28-5   | 61   | 0    |
| D-Mannitol                             | 69-65-8    | 61   | 0    |
| exo-Norborneol                         | 497-37-0   | 61   | 0    |
| Norcamphor                             | 497-38-1   | 61   | 0    |
| Safrole                                | 94-59-7    | 61   | 0    |
| Sucrose                                | 57-50-1    | 61   | 0    |
| Tannin                                 | 1401-55-4  | 61   | 0    |
| DL-Tryptophan                          | 54-12-6    | 61   | 0    |
| 3-Acetylcoumarin                       | 3949-36-8  | 60.5 | -0.5 |
| Adonitol                               | 488-81-3   | 60.5 | -0.5 |
| Amylose                                | 9005-82-7  | 60.5 | -0.5 |
| D-Arabinose                            | 10323-20-3 | 60.5 | -0.5 |
| Benzylamine                            | 100-46-9   | 60.5 | -0.5 |
| p-Bromo-DL-mandelic acid               | 6940-50-7  | 60.5 | -0.5 |
| rac-Camphor                            | 76-22-2    | 60.5 | -0.5 |
| 2-Chlorophenol                         | 95-57-8    | 60.5 | -0.5 |
| Cholin acetate                         | 14586-35-7 | 60.5 | -0.5 |
| 4-Chromamone                           | 491-37-2   | 60.5 | -0.5 |
| trans-Cinnamaldehyde                   | 14371-10-9 | 60.5 | -0.5 |
| p-Cresol                               | 106-44-5   | 60.5 | -0.5 |
| L-Fructose                             | 2438-80-4  | 60.5 | -0.5 |
| Galactan                               | 9037-55-2  | 60.5 | -0.5 |
| Hydroxyethylcellulose                  | 9004-62-0  | 60.5 | -0.5 |
| Isobutyl cinnamate predominantly trans | 122-67-8   | 60.5 | -0.5 |
| cis-Jasmone                            | 488-10-8   | 60.5 | -0.5 |
| Lactulose                              | 4618-18-2  | 60.5 | -0.5 |
| Methyl-D-mannopyranoside               | 617-04-9   | 60.5 | -0.5 |
| 3-Acetylpyrrodine                      | 350-03-8   | 60   | -1   |
| Adenine                                | 73-24-5    | 60   | -1   |
| Aniline                                | 62-53-3    | 60   | -1   |
| Anisole                                | 100-66-3   | 60   | -1   |
| Anthranilic acid                       | 118-92-3   | 60   | -1   |
| Arabuigalactan                         | 9036-66-2  | 60   | -1   |

|                                  |             |      |      |
|----------------------------------|-------------|------|------|
| Butyrophenone                    | 495-40-9    | 60   | -1   |
| Carboxymethylcellulose           | 9004-32-4   | 60   | -1   |
| Carrageen                        |             | 60   | -1   |
| Carvacrol                        | 499-75-2    | 60   | -1   |
| 4-Chloro-3-nitrocoumarin         | 38464-20-9  | 60   | -1   |
| rac(-)-Citronellic acid          | 502-47-6    | 60   | -1   |
| Fructose                         | 57-48-7     | 60   | -1   |
| D(+)-Galatosamine hydrochloride  | 1772-003-8  | 60   | -1   |
| Geranic acid                     | 459-80-3    | 60   | -1   |
| Glucoseamine                     | 3416-24-8   | 60   | -1   |
| Isobutyramide                    | 563-83-7    | 60   | -1   |
| Isophorone                       | 78-59-1     | 60   | -1   |
| 4-Isopropyl aniline              | 99-88-7     | 60   | -1   |
| 4-Isopropyl benzoic acid         | 536-66-3    | 60   | -1   |
| Maltodextrin                     | 9050-36-6   | 60   | -1   |
| Methyl- $\beta$ -D-glucoside     | 709-50-2    | 60   | -1   |
| Morpholine                       | 110-91-8    | 60   | -1   |
| 2-Naphtol                        | 135-19-3    | 60   | -1   |
| Natriumalginat                   | 9005-38-3   | 60   | -1   |
| D,L-Norvaline                    | 760-78-1    | 60   | -1   |
| 8-Quinolinol                     | 148-24-3    | 60   | -1   |
| D-Ribose                         | 50-69-1     | 60   | -1   |
| Trehalose Dihydrat               | 6138-23-4   | 60   | -1   |
| 2,3,3-Trimethylindolenine        | 1640-39-7   | 60   | -1   |
| Xylitol                          | 87-99-0     | 60   | -1   |
| L-Xylose                         | 609-06-3    | 60   | -1   |
| m-Anisaldehyde                   | 591-31-1    | 59.5 | -1.5 |
| m-Cresol                         | 108-39-4    | 59.5 | -1.5 |
| Indole                           | 120-72-9    | 59.5 | -1.5 |
| Methylnicotinate                 | 93-60-7     | 59.5 | -1.5 |
| Methylvaleraldehyde              | 123-15-9    | 59.5 | -1.5 |
| L-Arabinose                      | 5328-37-0   | 59   | -2   |
| Cellulose                        | 9004-34-6   | 59   | -2   |
| Chitin                           | 1398-61-4   | 59   | -2   |
| 4-Chlorophenol                   | 106-48-9    | 59   | -2   |
| D-Gluconic acid                  | 526-95-4    | 59   | -2   |
| Pyrocatechol                     | 120-80-9    | 59   | -2   |
| Quinoline                        | 91-22-5     | 59   | -2   |
| Xylan                            | 9014-63-5   | 59   | -2   |
| D,L-Phenylalanine                | 150-30-1    | 58.5 | -2.5 |
| Glucuronolactone                 | 32449-92-6  | 58   | -3   |
| Mannan                           | 9036-88-8   | 58   | -3   |
| D(+)-Glucuronic acid monohydrate | 207300-70-7 | 56.5 | -4.5 |
| Valeraldehyde                    | 110-62-3    | 56   | -5   |
| (+/-)-Menthol                    | 89-78-1     | 55   | -6   |
| (-)-Ephedrine                    | 299-42-3    | 54   | -7   |
| Gallic acid                      | 149-91-7    | 54   | -7   |

|                                             |            |      |       |
|---------------------------------------------|------------|------|-------|
| Benzoic acid                                | 65-85-0    | 53.5 | -7.5  |
| 4-Aminobenzoic acid                         | 150-13-0   | 50   | -11   |
| 3-Methylbutylaldehyde<br>(Isovaleraldehyde) | 590-86-3   | 48   | -13   |
| 3,5-Dihydroxybenzoic acid                   | 99-10-5    | 40.5 | -20.5 |
| D-Mandelic acid                             | 611-71-2   | 37   | -24   |
| 4-Acetylbenzoic acid                        | 586-89-0   | ---  | ---   |
| 2-Acetyl-1-methylpyrrole                    | 932-16-1   | ---  | ---   |
| 2-Aminophenol                               | 95-55-6    | ---  | ---   |
| 4-Aminophenol                               | 123-30-8   | ---  | ---   |
| 5-Aminosalicylic acid                       | 89-57-6    | ---  | ---   |
| trans-Anethole                              | 4180-23-8  | ---  | ---   |
| p-Anisaldehyde                              | 123-11-5   | ---  | ---   |
| p-Anisic acid                               | 100-09-4   | ---  | ---   |
| L-Arabinose                                 | 5328-37-0  | ---  | ---   |
| Benzaldehyde                                | 100-52-7   | ---  | ---   |
| Caffeic acid                                | 331-39-5   | ---  | ---   |
| 3-Chlorobenzylamine                         | 4152-90-3  | ---  | ---   |
| 3-Chloro-2-norboranone                      | 30860-22-1 | ---  | ---   |
| trans-Cinnamic acid                         | 140-10-3   | ---  | ---   |
| Curcumin                                    | 458-37-7   | ---  | ---   |
| 2,4-Dihydroxybenzoic acid                   | 89-86-1    | ---  | ---   |
| 2,5-Dihydroxybenzoic acid                   | 490-79-9   | ---  | ---   |
| 4-Dimethylaminopyridine, DMAP               | 1122-58-3  | ---  | ---   |
| 4-Ethylaniline                              | 589-16-2   | ---  | ---   |
| Hydrocinnamaldehyde                         | 104-53-0   | ---  | ---   |
| 4-Hydroxy-3-nitrocoumarin                   | 20261-31-8 | ---  | ---   |
| 2-Iodobenzoic acid                          | 88-67-5    | ---  | ---   |
| cis/trans Isoeugenol                        | 97-54-1    | ---  | ---   |
| Kojic acid                                  | 501-30-4   | ---  | ---   |
| Lignin                                      |            | ---  | ---   |
| L-Mandelic acid                             | 17199-29-0 | ---  | ---   |
| 1-Naphthol                                  | 90-15-3    | ---  | ---   |
| Pectin                                      | 9000-69-5  | ---  | ---   |
| Pyrogallol                                  | 87-66-1    | ---  | ---   |
| Salicylaldehyde                             | 90-02-8    | ---  | ---   |
| Valeric acid                                | 109-52-4   | ---  | ---   |

---

For details of the experimental set-up see “Materials & Methods”;

---, in the presence of these compounds no reproducible signal was obtained;

Table S2: Genes coexpressed with *AtBBE*-like 15 according to ATTET II server

| Rank | Mutual rank | Correlation | Locus                     | Function                                                            |
|------|-------------|-------------|---------------------------|---------------------------------------------------------------------|
| 1    | 2.6         | 0.72        | <a href="#">At1g26820</a> | ribonuclease 3                                                      |
| 2    | 3.5         | 0.68        | <a href="#">At3g10340</a> | phenylalanine ammonia-lyase 4                                       |
| 3    | 5.3         | 0.68        | <a href="#">At1g62990</a> | KNOTTED-like homeobox of Arabidopsis thaliana 7                     |
| 4    | 6.5         | 0.64        | <a href="#">At2g22560</a> | Kinase interacting (KIP1-like) family protein                       |
| 5    | 7.3         | 0.67        | <a href="#">At2g14095</a> |                                                                     |
| 6    | 7.5         | 0.67        | <a href="#">At1g28470</a> | NAC domain containing protein 10                                    |
| 7    | 8.1         | 0.69        | <a href="#">At4g16620</a> | nodulin MtN21 /EamA-like transporter family protein                 |
| 8    | 8.7         | 0.68        | <a href="#">At4g18425</a> | Protein of unknown function (DUF679)                                |
| 9    | 9.5         | 0.58        | <a href="#">At4g24430</a> | Rhamnogalacturonate lyase family protein                            |
| 10   | 9.8         | 0.65        | 260208_s_at               | At1g70670;At1g70680                                                 |
| 11   | 10.9        | 0.66        | <a href="#">At5g04200</a> | metacaspase 9                                                       |
| 12   | 12.4        | 0.66        | <a href="#">At1g11190</a> | bifunctional nuclease i                                             |
| 13   | 12.4        | 0.65        | <a href="#">At4g04460</a> | Saposin-like aspartyl protease family protein                       |
| 14   | 13.0        | 0.62        | <a href="#">At2g47670</a> | Plant invertase/pectin methylesterase inhibitor superfamily protein |
| 15   | 17.9        | 0.55        | <a href="#">At2g18480</a> | Major facilitator superfamily protein                               |
| 16   | 22.4        | 0.66        | 267343_at                 | At2g44260                                                           |
| 17   | 27.8        | 0.56        | <a href="#">At1g23560</a> | Domain of unknown function (DUF220)                                 |
| 18   | 28.0        | 0.58        | <a href="#">At3g21550</a> | DUF679 domain membrane protein 2                                    |
| 19   | 28.3        | 0.60        | <a href="#">At5g65530</a> | Protein kinase superfamily protein                                  |
| 20   | 30.5        | 0.54        | <a href="#">At2g22800</a> | Homeobox-leucine zipper protein family                              |
| 21   | 32.2        | 0.59        | <a href="#">At5g58730</a> | pfkB-like carbohydrate kinase family protein                        |
| 22   | 33.3        | 0.63        | <a href="#">At4g34320</a> | Protein of unknown function (DUF677)                                |
| 23   | 33.6        | 0.58        | <a href="#">At5g54570</a> | beta glucosidase 41                                                 |
| 24   | 34.3        | 0.62        | <a href="#">At5g08480</a> | VQ motif-containing protein                                         |
| 25   | 35.4        | 0.53        | <a href="#">At3g27200</a> | Cupredoxin superfamily protein                                      |

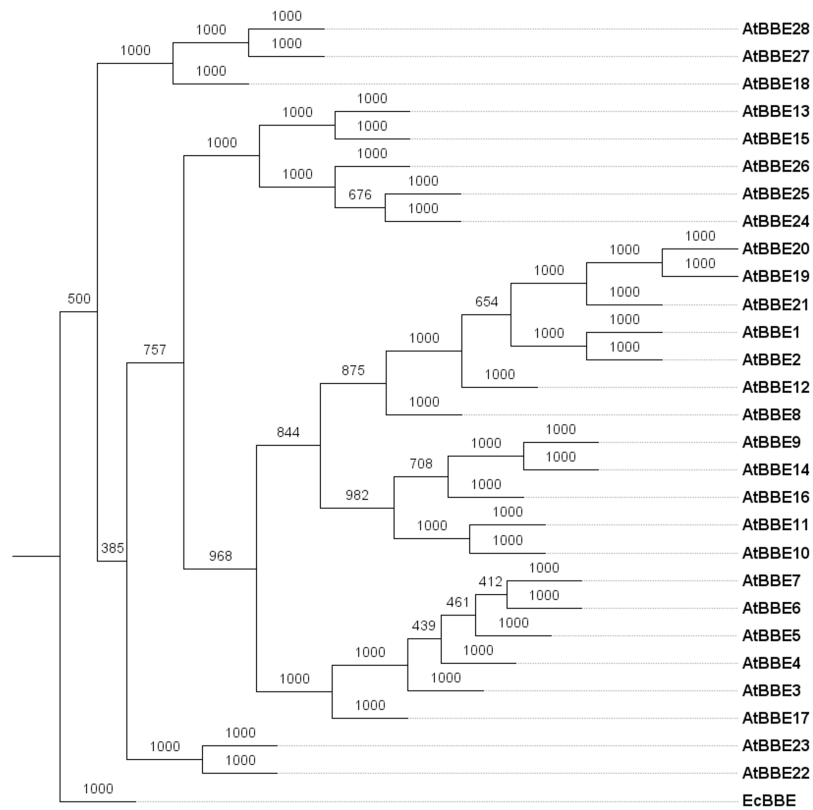

Figure S1: Bootstrapped phylogenetic tree including all *AtBBE*-like proteins and *EcBBE*. The following sequences were used for analysis (locus name/Accession number):

*AtBBE*-like 1, AT1G01980.1/Q9LPC3; *AtBBE*-like 2, AT1G11770.1/Q9SA99;  
*AtBBE*-like 3, AT1G26380.1/Q9FZC4; *AtBBE*-like 4, AT1G26390.1/Q9FZC5;  
*AtBBE*-like 5, AT1G26400.1/Q9FZC6; *AtBBE*-like 6, AT1G26410.1/Q9FZC7;  
*AtBBE*-like 7, AT1G26420.1/Q9FZC8; *AtBBE*-like 8, AT1G30700.1/Q9SA85;  
*AtBBE*-like 9, AT1G30710.1/Q9SA86; *AtBBE*-like 10, AT1G30720.1/Q9SA87;  
*AtBBE*-like 11, AT1G30730.1/Q9SA88; *AtBBE*-like 12, AT1G30740.1/Q9SA89;  
*AtBBE*-like 13, AT1G30760.1/Q93ZA3; *AtBBE*-like 14, AT1G34575.1/Q9LNL9;  
*AtBBE*-like 15, AT2G34790.1/O64743; *AtBBE*-like 16, AT2G34810.1/O64745;  
*AtBBE*-like 17, AT4G20800.1/Q9SVG7; *AtBBE*-like 18, AT4G20820.1/Q9SVG5;  
*AtBBE*-like 19, AT4G20830.1/Q9SVG4; *AtBBE*-like 20, AT4G20830.2/Q9SVG4;  
*AtBBE*-like 21, AT4G20840.1/Q9SVG3; *AtBBE*-like 22, AT4G20860.1/Q9SUC6;  
*AtBBE*-like 23, AT5G44360.1/Q9FKV2; *AtBBE*-like 24, AT5G44380.1/Q9FKV0;  
*AtBBE*-like 25, AT5G44390.1/Q9FKU9; *AtBBE*-like 26, AT5G44400.1/Q9FKU8;  
*AtBBE*-like 27, AT5G44410.1/Q9FI25; *AtBBE*-like 28, AT5G44440.1/Q9FI21; *EcBBE*, AAC39358.
